# Supplementary material
Source: publisher figshare collection journal article supplement (https://springernature.figshare.com/ndownloader/files/13892273)

**Ave. FDR with 50 total samples**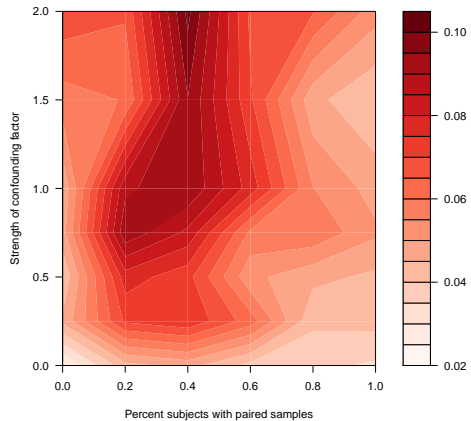**Ave. FDR with 100 total samples**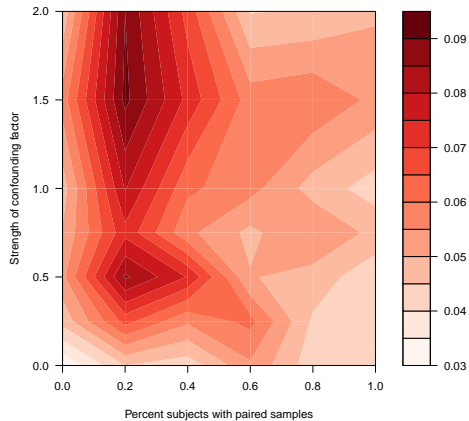**Ave. FDR with 200 total samples**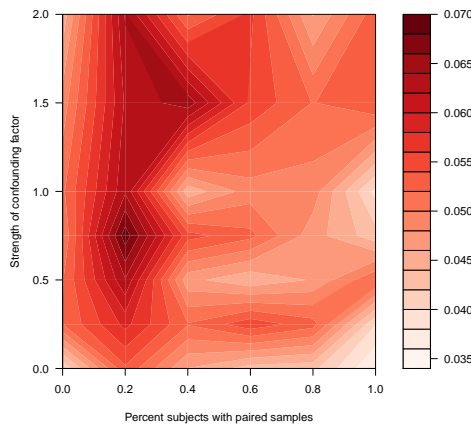**Ave. FDR with 500 total samples**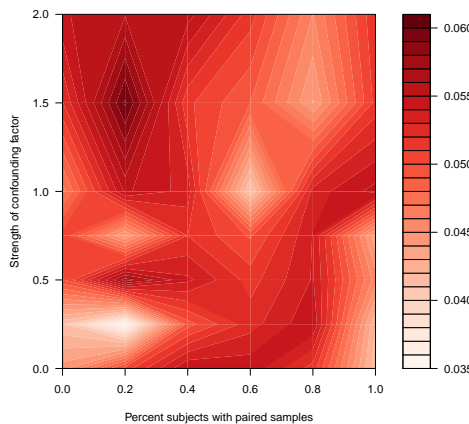

**Median FDR with 50 total samples**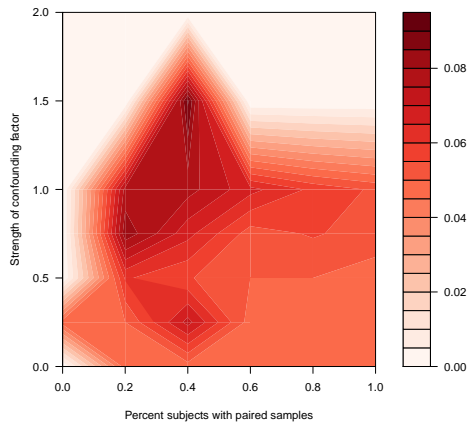**Median FDR with 100 total samples**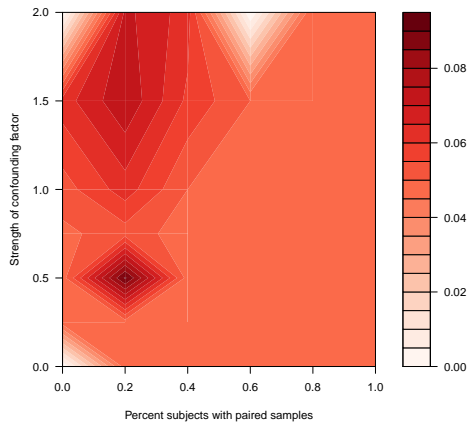**Median FDR with 200 total samples**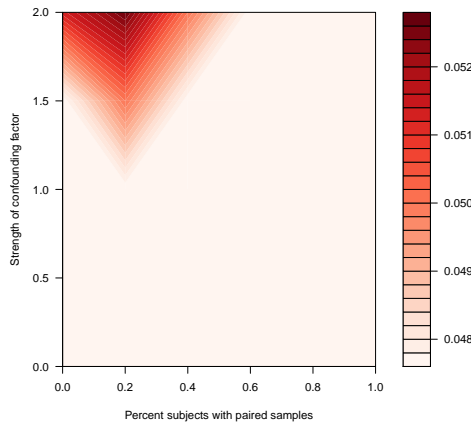**Median FDR with 500 total samples**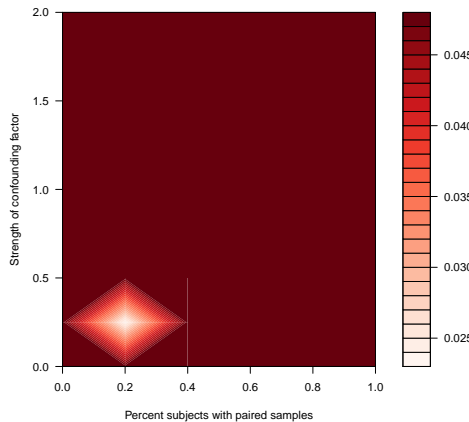

**SD FDR with 50 total samples**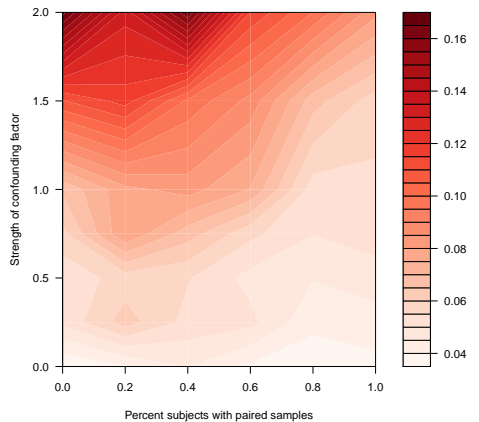**SD FDR with 100 total samples**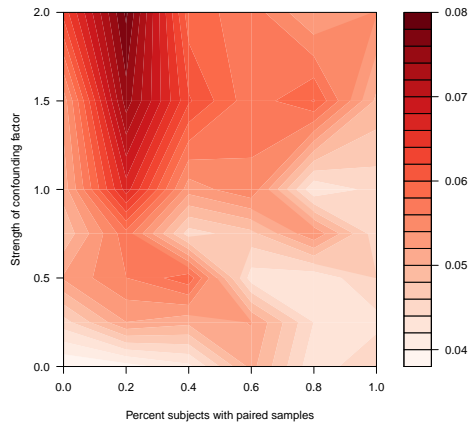**SD FDR with 200 total samples**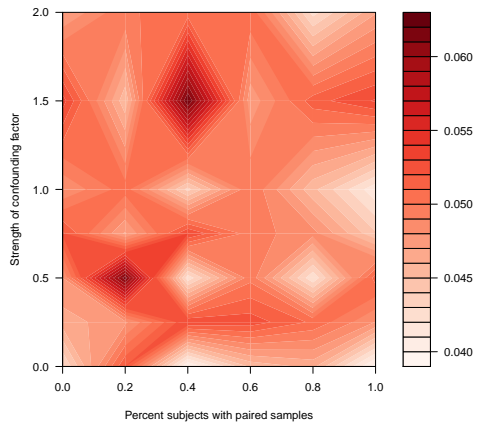**SD FDR with 500 total samples**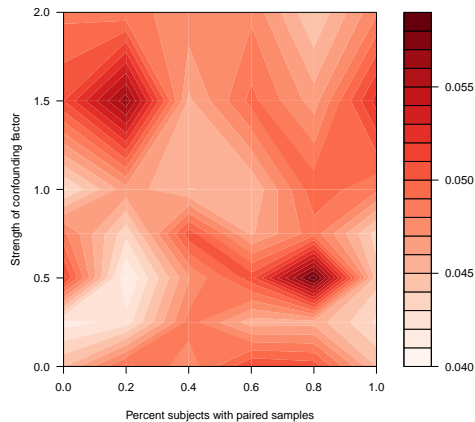

**Range FDR with 50 total samples**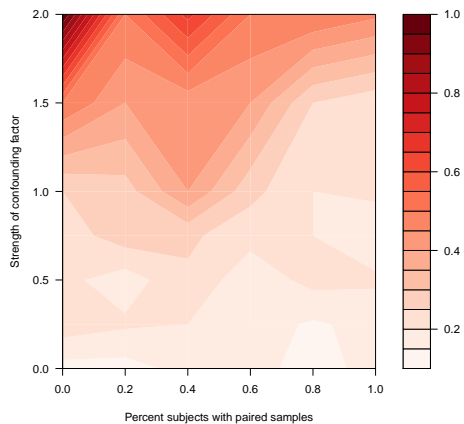**Range FDR with 100 total samples**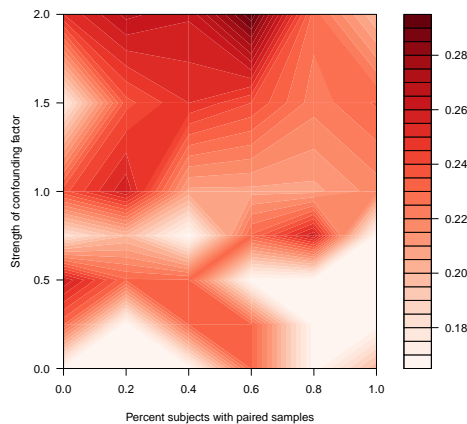**Range FDR with 200 total samples**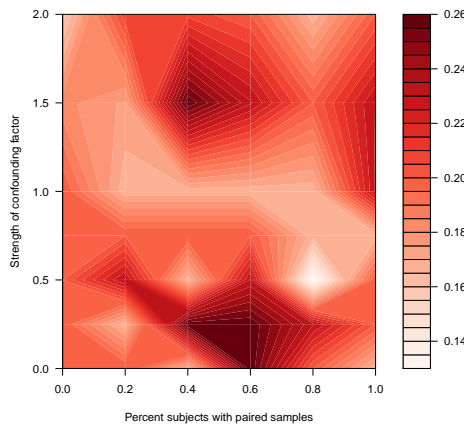**Range FDR with 500 total samples**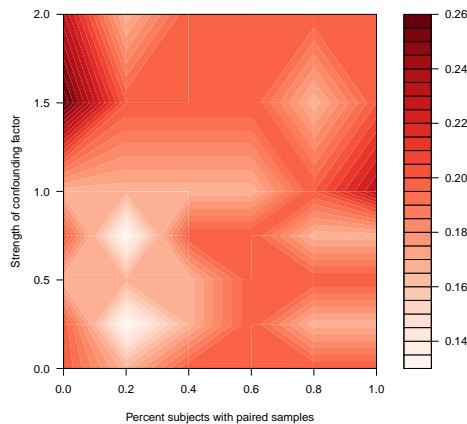

Supplement: Supplementary file [file 13892273]
